# Supplementary material for: Visualisation of DCP, a nerve agent mimic, in Catfish brain by a simple chemosensor
Source: PubMed Central journal article supplement (PMC5821826; doi:10.1038/s41598-018-21780-5), 2018-02-21
Supplement: 41598_2018_21780_MOESM1_ESM.pdf [file 41598_2018_21780_MOESM1_ESM.pdf]

## **Supplementary Information**

# **Visualisation of DCP, a nerve agent mimic, in Catfish brain by a simple chemosensor**

Himadri Sekhar Sarkar<sup>1</sup>, Ayndrila Ghosh<sup>1</sup>, Sujoy Das<sup>1</sup>, Pulak Kumar Maiti<sup>2</sup>, Sudipta Maitra<sup>3</sup>, Sukhendu Mandal<sup>2</sup> & Prithidipa Sahoo<sup>1</sup>

<sup>1</sup>Department of Chemistry, Visva-Bharati University, Santiniketan, 731235, India. <sup>2</sup>Department of Microbiology, University of Calcutta, Kolkata-700019, India. <sup>3</sup>Department of Zoology, Visva-Bharati University, Santiniketan, 731235, India.  
Correspondence and requests for materials should be addressed to P.S. (email: prithidipa@hotmail.com)

**Table S1.** Performance comparison of existing methods and present method for detection of **DCP**.

| Analytes   | Sensor type                                                 | Detection limit               | Medium              | Detection method                       | Detection state            | <i>In vivo</i> experiment | References                                                       |
|------------|-------------------------------------------------------------|-------------------------------|---------------------|----------------------------------------|----------------------------|---------------------------|------------------------------------------------------------------|
| <b>DCP</b> | <b>Rhodamine</b>                                            | <b>5.6 nM</b>                 | <b>Basic medium</b> | <b>Naked-eye, UV-Vis, Fluorescence</b> | <b>Liquid/Vapour state</b> | <b>Yes</b>                | <b>Present manuscript</b>                                        |
| DCP, DCNP  | Triaryl methane dye                                         | 2.1-3.2 mmol dm <sup>-3</sup> | Acidic medium       | Naked-eye, UV-Vis                      | Liquid state               | No                        | <i>Tetrahedron</i> <b>68</b> , 8612-8616 (2012)                  |
| DCP        | Rhodamine                                                   | 0.2 μM                        | Basic medium        | Naked-eye, UV-Vis, Fluorescence        | Vapour state               | No                        | <i>RSC Adv.</i> <b>4</b> , 21984-21988 (2014)                    |
| DFP, DCNP  | BODIPY                                                      | 0.36 and 0.40 ppm             | -                   | Naked-eye, UV-Vis                      | Liquid/Vapour state        | No                        | <i>Org. Biomol. Chem.</i> <b>12</b> , 8745-8751 (2014)           |
| DCP        | Rhodamine-thiourea                                          | 0.14 μM                       | Basic medium        | Naked-eye, UV-Vis, Fluorescence        | Liquid/Vapour state        | No                        | <i>Sensors and Actuators B: Chemical</i> <b>235</b> , 447 (2016) |
| DCP        | Napthothiazolium conjugated benzothiazole derivative (NTBT) | 17 nM                         | -                   | Naked-eye, UV-Vis, Fluorescence        | Liquid/Vapour state        | No                        | <i>Chem. Commun.</i> <b>51</b> , 9729-9732 (2015)                |
| DFP        | Organo silyl ether                                          | 5.4 ppm                       | Basic medium        | Naked-eye, UV-Vis, Fluorescence        | Liquid state               | No                        | <i>Chemistry Open</i> <b>3</b> , 142 (2014)                      |
| DCP        | Rhodamine-hydroxamate                                       | ND                            | Basic medium        | Naked-eye, UV-Vis, Fluorescence        | Liquid state               | No                        | <i>Chem. Commun.</i> <b>46</b> , 8413-8415 (2010)                |
| DCP        | Rhodamine-deoxylactam                                       | ND                            | Basic medium        | Naked-eye, UV-Vis, Fluorescence        | Liquid state               | No                        | <i>Chem. Commun.</i> <b>47</b> 11468-11470. (2011)               |
| DCP        | Hydroxynaphthalene-hemicyanine dye                          | 18.86 nM                      | Basic medium        | Naked-eye, UV-Vis, Fluorescence        | Liquid/Vapour state        | No                        | <i>Org. Biomol. Chem.</i> <b>15</b> , 5959 (2017)                |

## 2. NMR Studies

### $^1\text{H}$ NMR of ARC in $\text{DMSO-d}_6$ :

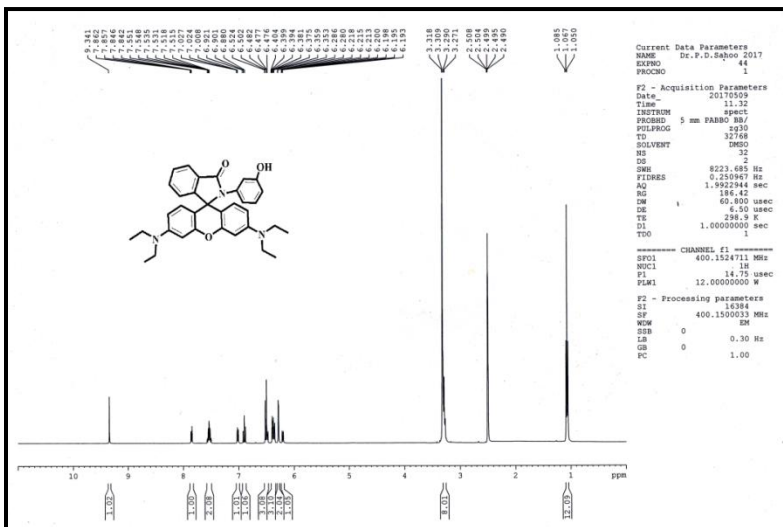

Figure S1.  $^1\text{H}$  NMR of ARC in  $\text{DMSO-d}_6$  (400 MHz).

### $^{13}\text{C}$ NMR of ARC in $\text{DMSO-d}_6$ :

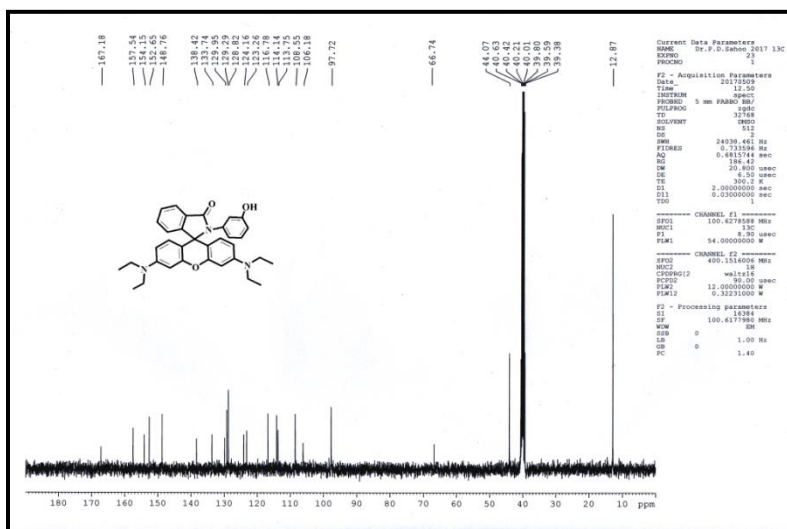

Figure S2.  $^{13}\text{C}$  NMR of ARC in  $\text{DMSO-d}_6$  (400 MHz).

## Mass spectrum of ARC:

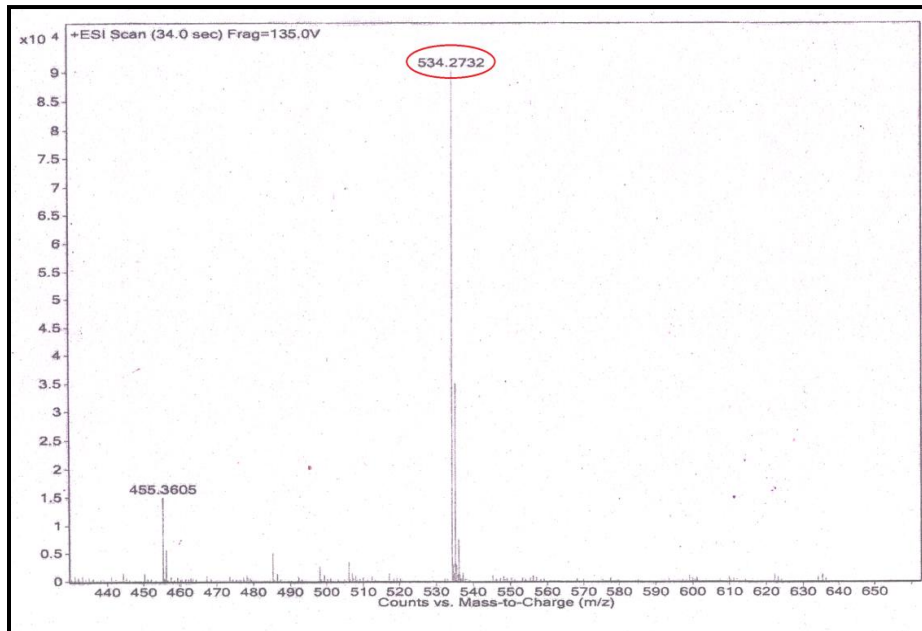

**Figure S3.** HRMS of ARC.

## Measurement of fluorescence quantum yields<sup>1</sup>:

The fluorescence quantum yield (QY) of **ARC** was determined relative to a reference compound of known QY. Rhodamine B ( $\Phi_F = 0.69$  in ethanol) as a reference compound because it has emission profile between 500-600 nm similar to **ARC**. As shown in **Table S2**, the quantum yield of **ARC** increased upon addition of **DCP**. Almost 100-fold fluorescence intensity increased upon addition of **DCP**.

**Table S2.** Comparison of quantum yields of **ARC** and **ARC-DCP** complex

| Sample                 | Quantum yield at 585 nm* |
|------------------------|--------------------------|
| <b>ARC</b>             | 0.006 ± 0.001            |
| <b>ARC-DCP</b> complex | 0.58 ± 0.03              |

\*Average value of three determinations.

## Evaluation of the association constants for the formation of ARC-DCP complex:

### By Fluorescence Method:

Binding constant of the chemosensor **ARC** was calculated through emission method by using the following equation:

$$1/(I - I_0) = 1/K(I_{\max} - I_0) [G] + 1/(I_{\max} - I_0) \dots\dots\dots(ii)$$

Where  $I_0$ ,  $I_{\max}$ , and  $I$  represent the emission intensity of free **ARC**, the maximum emission intensity observed in the presence of added **DCP** at 585 nm ( $\lambda_{ex} = 520$  nm),  $[G]$  is the concentration of the guest **DCP** and the emission intensity at a certain concentration of the **DCP**, respectively.  $[H]$  is the concentration of the host **ARC**.

### Binding constant calculation graph (Fluorescence method):

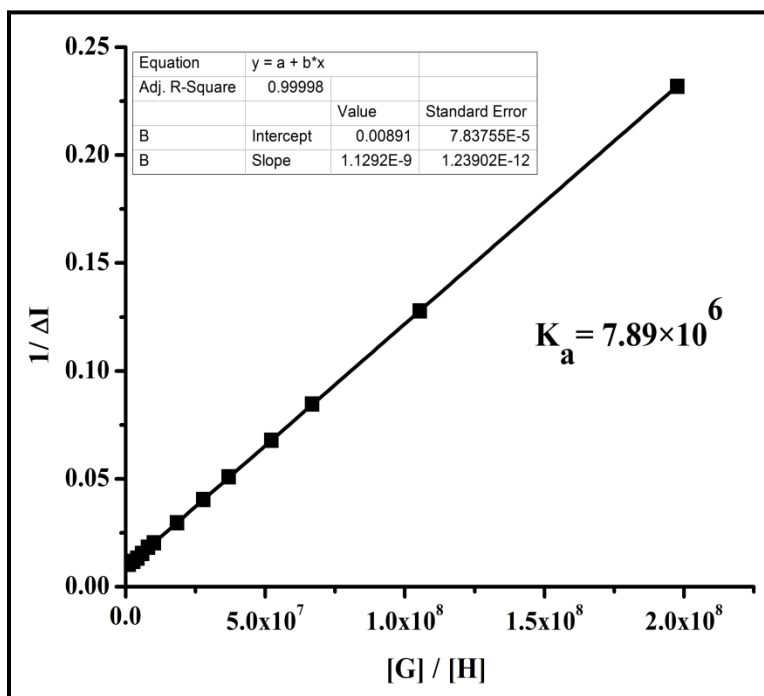

**Figure S4.** Linear regression analysis ( $1/[G]$  vs  $1/\Delta I$ ) for the calculation of association constant value by fluorescence titration method.

The association const. ( $K_a$ ) of **ARC** for sensing **DCP** was determined from the equation:  $K_a = \text{intercept/slope}$ . From the linear fit graph we get intercept = 0.00891, slope =  $1.1292 \times 10^{-9}$ . Thus we get,  $K_a = 0.00891 / (1.1292 \times 10^{-9}) = 7.89 \times 10^6 \text{ M}^{-1}$ .

## Calculation of limit of detection (LOD) of ARC with DCP:

The detection limit of the chemosensor **ARC** for **DCP** was calculated on the basis of fluorescence titration. To determine the standard deviation for the fluorescence intensity, the emission intensity of four individual receptors without **DCP** was measured by 10 times and the standard deviation of blank measurements was calculated.

The limit of detection (LOD) of **ARC** for sensing **DCP** was determined from the following equation<sup>2-3</sup>:

$$\text{LOD} = K \times \text{SD}/S$$

Where  $K = 2$  or  $3$  (we take  $3$  in this case);  $\text{SD}$  is the standard deviation of the blank receptor solution;  $S$  is the slope of the calibration curve.

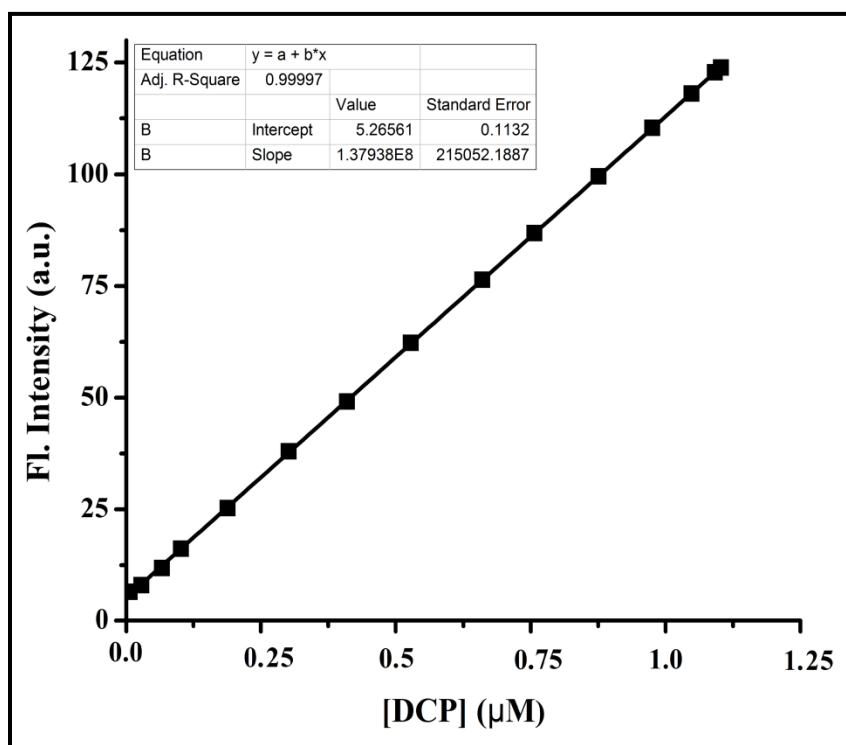

**Figure S5.** Linear fit curve of **ARC** at 585 nm with respect to **DCP** concentration.

For **ARC** with **DCP**:

From the linear fit graph we get slope =  $1.37938 \times 10^8$ , and  $\text{SD}$  value is 0.26037.

Thus using the above formula we get the Limit of Detection =  $0.56 \times 10^{-8}$  M, i.e 5.6 nM.

Therefore **ARC** can detect **DCP** up to this very lower concentration by fluorescence technique.

## Selectivity studies:

### Comparative UV-vis studies of ARC with various organophosphates:

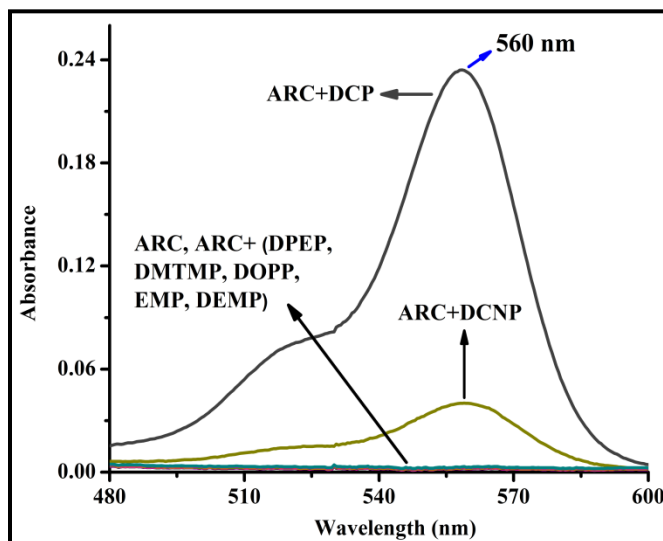

**Figure S6.** UV-vis spectra of ARC (1  $\mu\text{M}$ ) upon addition of different organophosphates in  $\text{H}_2\text{O}-\text{CH}_3\text{CN}$  (10:1, v/v) at neutral pH (Guests conc. = 10  $\mu\text{M}$ ). [From left to right: ARC, ARC with DCP, diethylcyanophosphonate (DCNP), diethyl(1-phenylethyl)phosphonate (DPEP), diethyl(methylthiomethyl)phosphonate (DMTMP), diethyl-(2-oxopropyl)phosphonate (DOPP), Ethyl methylphosphonate (EMP), Diethyl methylphosphonate (DEMP)].

### Competitive fluorescence studies of ARC with various organophosphates:

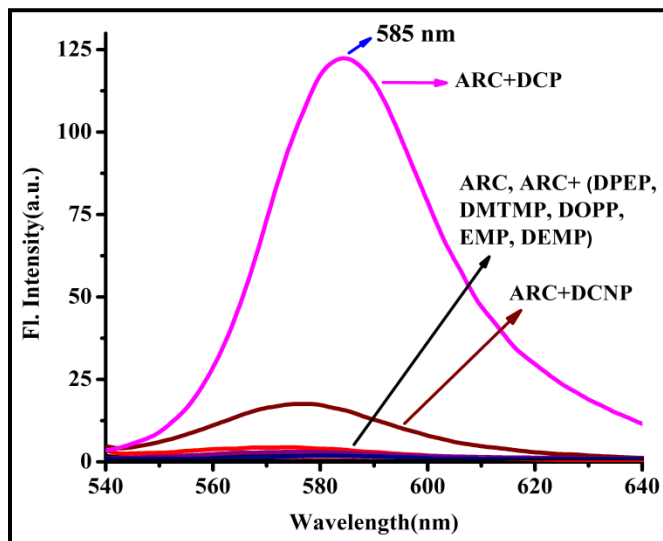

**Figure S7.** Fluorescence emission spectra of ARC (1  $\mu\text{M}$ ) upon addition of different organophosphates at 585 nm ( $\lambda_{\text{ex}} = 520$  nm) in  $\text{H}_2\text{O}-\text{CH}_3\text{CN}$  (10:1, v/v) at neutral pH (Guests conc. = 10  $\mu\text{M}$ ).

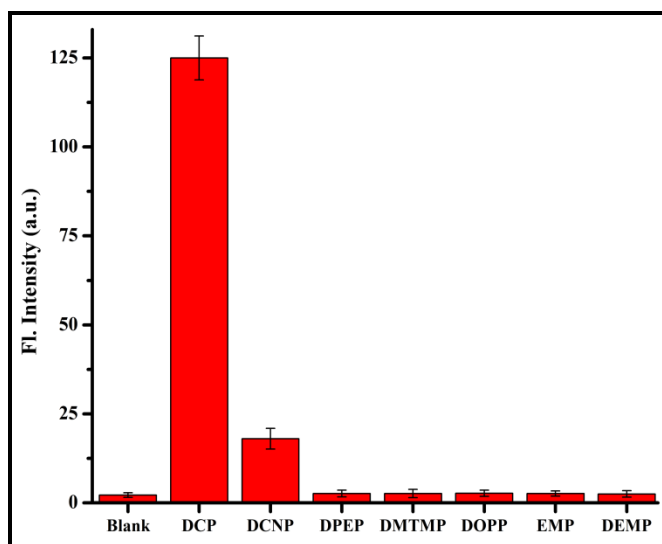

**Figure S8.** Histogram representing competitive fluorescence spectra of **ARC** with different organophosphates at 585 nm ( $\lambda_{\text{ex}} = 520$  nm) in  $\text{H}_2\text{O}-\text{CH}_3\text{CN}$  (10:1, v/v) at neutral pH. Error bars represent standard deviations ( $n = 3$ ).

**Competitive fluorescence studies of ARC with various interfering substances and metal ions:**

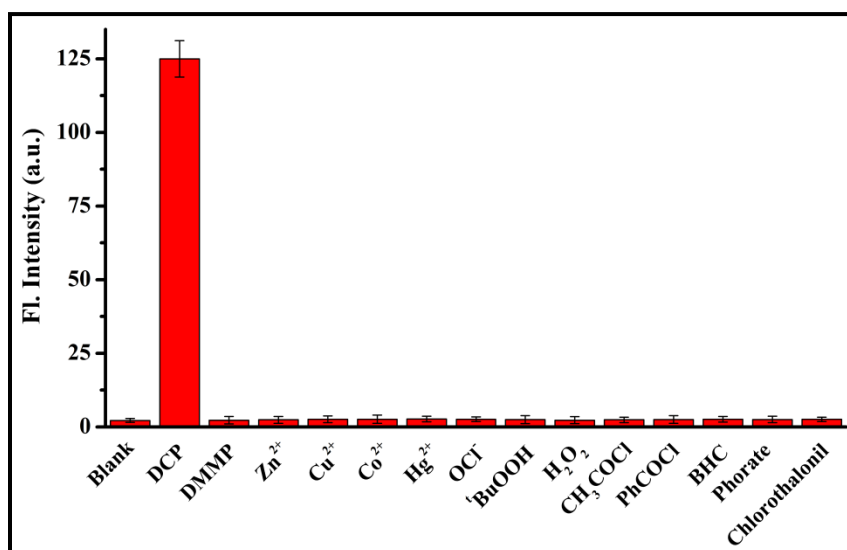

**Figure S9.** Histogram representing competitive fluorescence spectra of **ARC** with various interfering substances and metal ions at 585 nm ( $\lambda_{\text{ex}} = 520$  nm) in  $\text{H}_2\text{O}-\text{CH}_3\text{CN}$  (10:1, v/v) at neutral pH. [From left to right: **ARC**, **ARC** with- **DCP**, dimethylmethylphosphate (DMMP),  $\text{Zn}^{2+}$ ,  $\text{Cu}^{2+}$ ,  $\text{Co}^{2+}$ ,  $\text{Hg}^{2+}$ ,  $\text{NaOCl}$ , <sup>t</sup>BuOOH,  $\text{H}_2\text{O}_2$ ,  $\text{CH}_3\text{COCl}$ ,  $\text{PhCOCl}$ , benzene hexachloride (BHC), phorate and chlorothalonil]. Error bars represent standard deviations ( $n = 3$ ).



## Kinetic study:

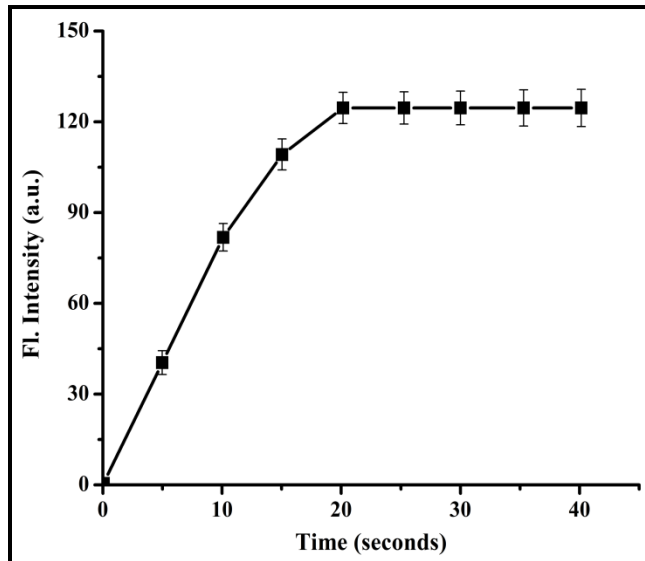

**Figure S10.** The fluorescence intensities at 585 nm vary in a time range of 40 s. The excitation wavelength was set at 520 nm. Each point of the plot represents the average of at least 3 independent kinetic experiments.

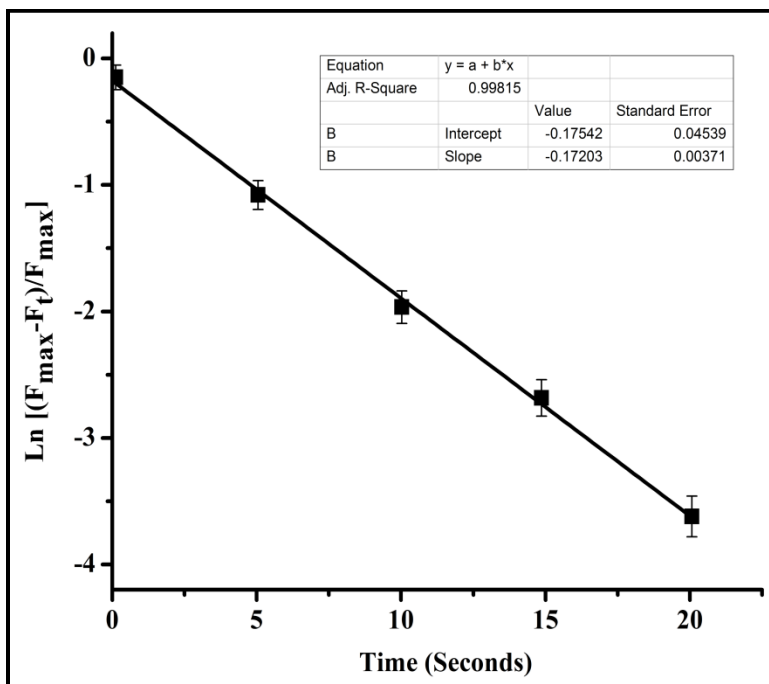

**Figure S11.** Pseudo first-order kinetic plot for the reaction of **ARC** (1  $\mu\text{M}$ ) with **DCP** (10  $\mu\text{M}$ ). Each point of the plot represents the average of at least 3 independent kinetic experiments.

## Vapour phase detection of DCP by ARC:

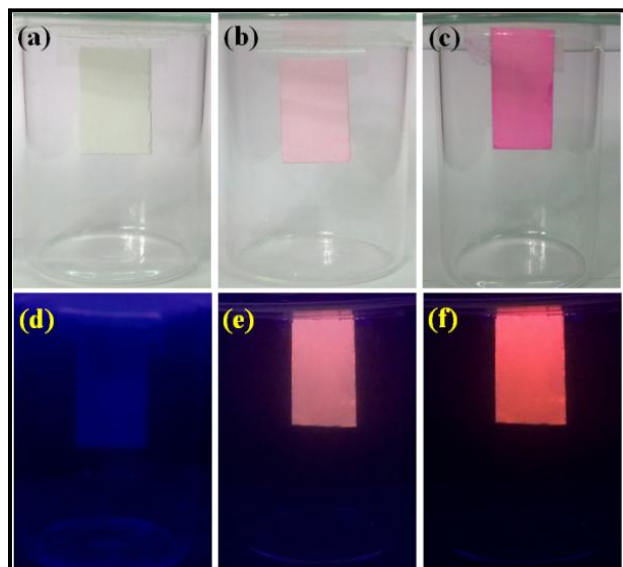

**Figure S12.** Display of vapour phase sensing of **DCP** using an **ARC** coated paper strip in visual (top) and under a UV lamp (bottom): (a) only an **ARC** coated filter paper; (b) after 15 seconds of incubation of **DCP**; (c) after 30 seconds of incubation of **DCP**; d, e and f are the UV-photographic images of a, b and c respectively.

## pH titration study:

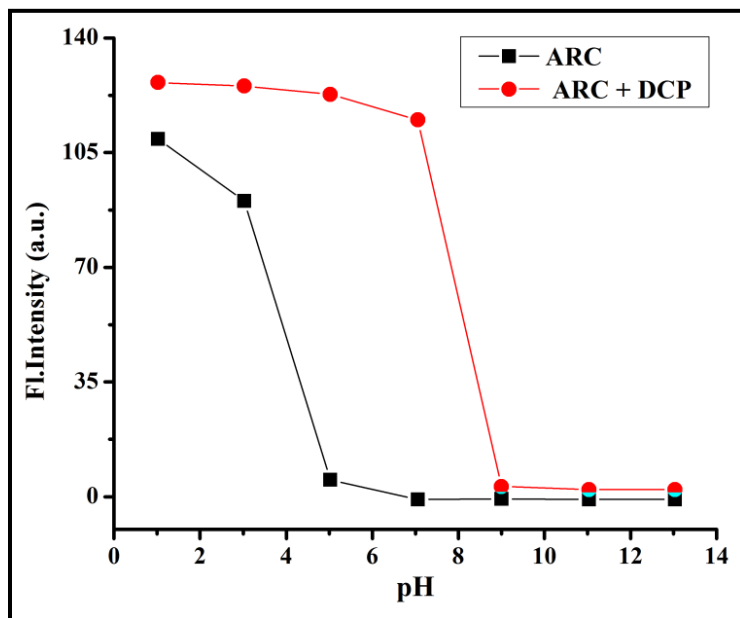

**Figure S13.** Effect of pH on the fluorescence intensity of **ARC** (1  $\mu\text{M}$ ) in the absence of **DCP** (black line) and in the presence of **DCP** (10  $\mu\text{M}$ , red line).

### $^1\text{H}$ NMR titration spectrum of ARC with DCP:

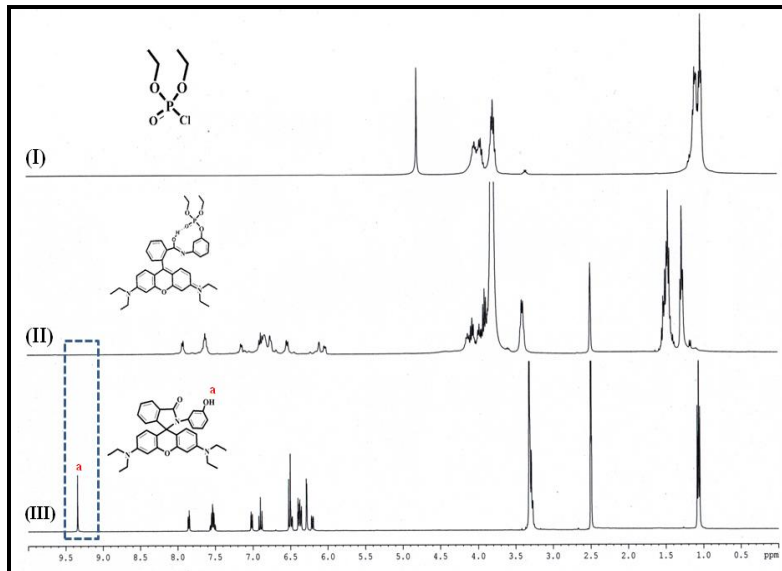

**Figure S14.**  $^1\text{H}$  NMR titration [400MHz] of **ARC** in  $\text{DMSO-d}_6$  at  $25^\circ\text{C}$  and the corresponding changes after the addition of 1 equiv. of **DCP** in  $\text{D}_2\text{O}$  from (i) only **DCP**, (ii) **ARC** + 1 equiv. of **DCP**, (iii) only **ARC**.

### $^{13}\text{C}$ NMR titration spectrum of ARC with DCP:

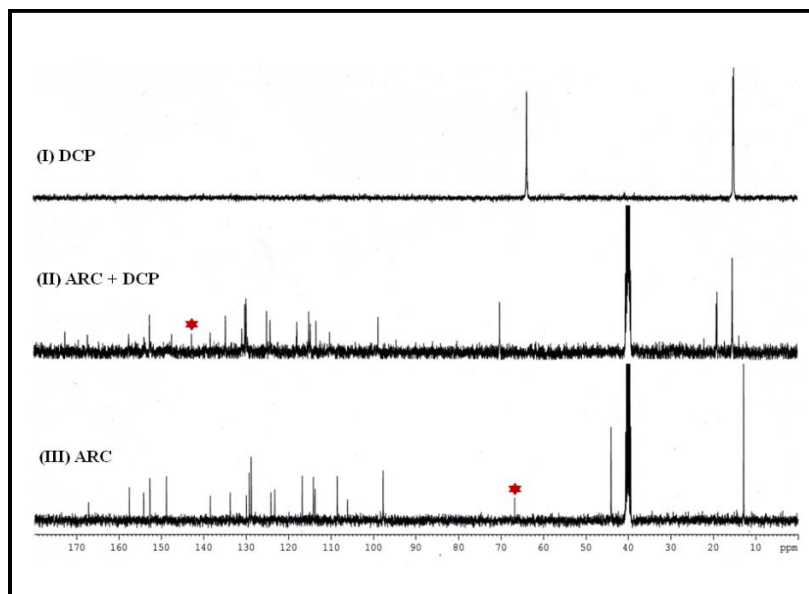

**Figure S15.**  $^{13}\text{C}$  NMR titration [400MHz] of **ARC** in  $\text{DMSO-d}_6$  at  $25^\circ\text{C}$  and the corresponding changes after addition of one equiv. of **DCP** in  $\text{D}_2\text{O}$  from (i) only **DCP**, (ii) **ARC** + 1 equiv. of **DCP**, (iii) only **ARC**. The red spot indicates the shifting of the spiro cyclic carbon peak from 67 ppm to 143 ppm in the open form.

### $^{31}\text{P}$ NMR titration spectrum of ARC with DCP:

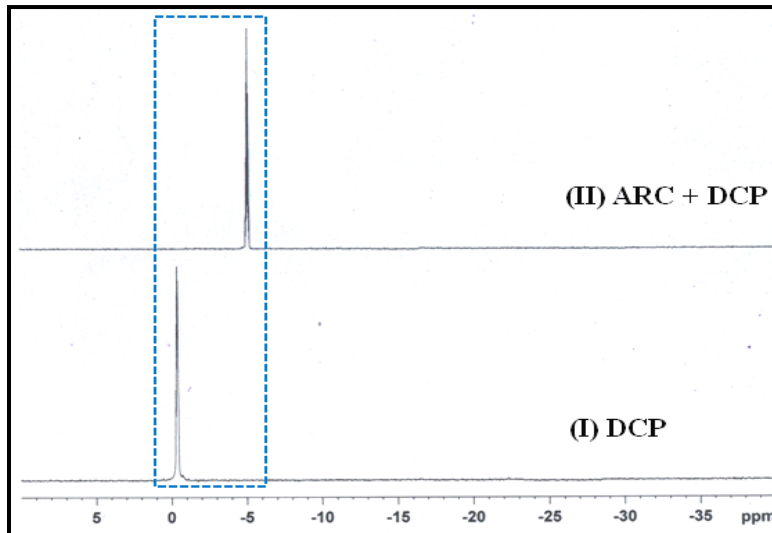

**Figure S16.**  $^{31}\text{P}$  NMR titration [400MHz] of **ARC** in  $\text{DMSO-d}_6$  at  $25^\circ\text{C}$  and the corresponding changes after addition of one equiv. of **DCP** in  $\text{D}_2\text{O}$  from (I) only **DCP**, (II) **ARC** + 1 equiv. of **DCP**.

### DFT Study:

Binding of **ARC** and **DCP** has been investigated by quantum chemical calculations at the TDDFT level 6-31G+(d,p) method basis set implemented at Gaussian 09 program. Solvent effects were incorporated using CPCM solvent model. Geometry optimization resulted in conformational changes at the spiro-lactam position of **ARC**, while **DCP** takes part to accommodate a probe molecule to get the stable complex structure. This theoretical study strongly correlates the experimental findings.

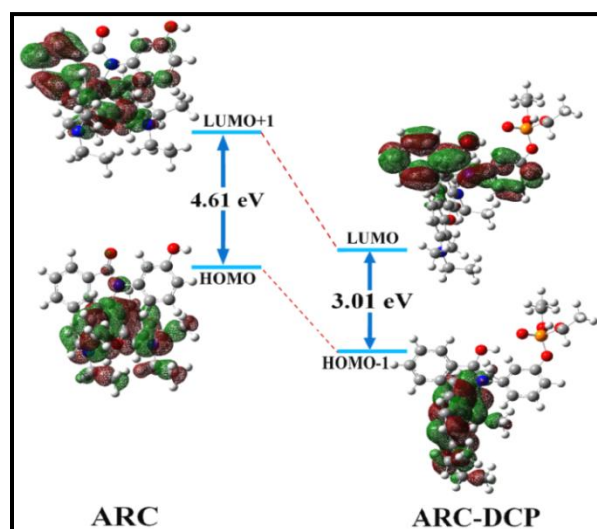

**Figure S17.** HOMO and LUMO distributions of **ARC** and **ARC-DCP** complex.

**Table S3.** Selected electronic excitation energies (eV), oscillator strengths (f), main configurations of the low-lying excited states of all the molecules and complexes. The data were calculated by TDDFT//B3LYP/6-31G+(d,p) based on the optimized ground state geometries.

| Molecules      | Electronic Transition            | Excitation Energy <sup>a</sup> | f <sup>b</sup> | Composition <sup>c</sup> (%)        |
|----------------|----------------------------------|--------------------------------|----------------|-------------------------------------|
| <b>ARC</b>     | S <sub>0</sub> → S <sub>12</sub> | 4.0183 eV 308 nm               | 0.1688         | H → L+1 (69.1%)                     |
|                | S <sub>0</sub> → S <sub>9</sub>  | 3.6297 eV 341.58 nm            | 0.0839         | H -2 → L (36.8%)                    |
| <b>ARC-DCP</b> | S <sub>0</sub> → S <sub>1</sub>  | 2.7695 eV 553.03 nm            | 0.7625         | H -1 → L (73.4%)                    |
|                | S <sub>0</sub> → S <sub>7</sub>  | 3.7707 eV 329 nm               | 0.1048         | H → L+1 (49.5%)<br>H -6 → L (35.4%) |

<sup>a</sup>Only selected excited states were considered. The numbers in parentheses are the excitation energy in wavelength. <sup>b</sup>Oscillator strength. <sup>c</sup>H stands for HOMO and L stands for LUMO.

**Table S4.** Energies of the highest occupied molecular orbital (HOMO) and lowest unoccupied molecular orbital (LUMO).

| Species        | E <sub>HOMO</sub><br>(a.u) | E <sub>LUMO</sub><br>(a.u) | ΔE(a.u) | ΔE(eV) | ΔE(kcal/mol) |
|----------------|----------------------------|----------------------------|---------|--------|--------------|
| <b>ARC</b>     | -0.19073                   | -0.02106                   | 0.16967 | 4.61   | 106.46       |
| <b>ARC-DCP</b> | -0.29294                   | -0.18240                   | 0.11054 | 3.01   | 69.36        |

## Live Cell Imaging:

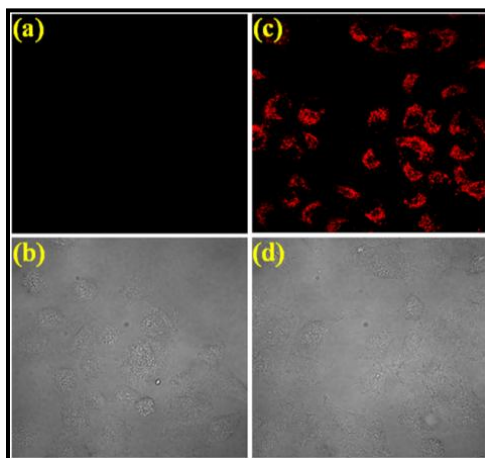

**Figure S18.** Confocal microscopic images of A549 cells (Human cell A549, ATCC No CCL-185) treated with **ARC** and **DCP** (a) Cells treated with **ARC** at 1  $\mu\text{M}$  concentration. (b) Bright field image of (a). (c) Cells treated with **ARC** and **DCP** at concentration 10  $\mu\text{M}$ . (d) Bright field image of (c). All images were acquired with a 60x objective lens with the applied wavelengths:  $E_{\text{ex}}=534\text{ nm}$ ,  $E_{\text{em}}=572\text{ nm}$ . Filter used: POPO-3.

## Cytotoxicity Assay:

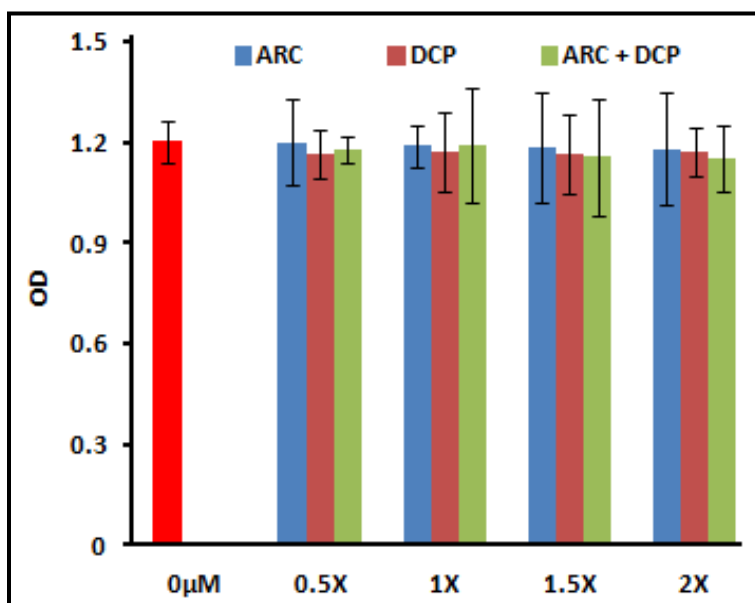

**Figure S19.** MTT assay to determine the cytotoxic effect of **ARC**, **DCP** and **ARC-DCP** complex on A549 cells (Human cell A549, ATCC No CCL-185).

## References:

1. Williams, A. T. R., Winfield, S. A. & Miller, J. N. Relative fluorescence quantum yields using a computer-controlled luminescence spectrometer. *Analyst* **108**, 1067-1071 (1983).
2. Long, L. *et al.* A fluorescence ratiometric sensor for hypochlorite based on a novel dual-fluorophore response approach. *Anal. Chim. Acta.* **775**, 100 (2013).
3. Zhu, M. *et al.* Visible Near-Infrared Chemosensor for Mercury Ion. *Org. Lett.* **10**, 1481 (2008).
4. Nath, P. & Maitra, S. Role of two plasma vitellogenins from Indian major carp (*Cirrhinus mrigala*) in catfish (*Clarias batrachus*) vitellogenesis. *General and Comparative Endocrinology* **124**, 30-44 (2001).
